# Supplementary material for: EGFR-targeted intraoperative fluorescence imaging detects high-grade glioma with panitumumab-IRDye800 in a phase 1 clinical trial
Source: Theranostics. 2021 May 21;11(15):7130–43. doi: 10.7150/thno.60582 (PMC8210618; doi:10.7150/thno.60582)

## Supplementary information

**Table S1.** Severity and attribution of adverse events

|                      | Adverse Event               | Grade | Attribution | SAE* | DLT† |
|----------------------|-----------------------------|-------|-------------|------|------|
| <b>50 mg Cohort</b>  |                             |       |             |      |      |
| Patient 1            |                             |       |             |      |      |
| Day 16               | Pain                        | 1     | Unrelated   | No   | No   |
| Patient 2            |                             |       |             |      |      |
| Day 16               | Fatigue                     | 1     | Unrelated   | No   | No   |
| Day 16               | Wound infection             | 1     | Unrelated   | No   | No   |
| Day 16               | Localized edema             | 1     | Unrelated   | No   | No   |
| Day 30               | Arthralgia                  | 1     | Unrelated   | No   | No   |
| Patient 3            |                             |       |             |      |      |
| Day 30               | Edema limbs                 | 2     | Unrelated   | No   | No   |
| Patient 5            |                             |       |             |      |      |
| Day 16               | Confusion                   | 2     | Unrelated   | No   | No   |
| Day 30               | Confusion                   | 1     | Unrelated   | No   | No   |
| <b>100 mg Cohort</b> |                             |       |             |      |      |
| Patient 7            |                             |       |             |      |      |
| Day 16               | Memory impairment           | 1     | Unrelated   | No   | No   |
| Patient 8            |                             |       |             |      |      |
| Day 2                | Vestibular disorder         | 1     | Unrelated   | No   | No   |
| Day 2                | Hearing impaired            | 1     | Unrelated   | No   | No   |
| Day 2                | Concentration impairment    | 1     | Unrelated   | No   | No   |
| Day 2                | Gait disturbance            | 1     | Unrelated   | No   | No   |
| Day 2                | Hypertension                | 1     | Unrelated   | No   | No   |
| Day 16               | Vestibular disorder         | 1     | Unrelated   | No   | No   |
| Day 16               | Confusion                   | 1     | Unrelated   | No   | No   |
| Day 16               | Memory impairment           | 1     | Unrelated   | No   | No   |
| Day 16               | Muscle weakness right-sided | 1     | Unrelated   | No   | No   |
| Day 16               | Headache                    | 1     | Unrelated   | No   | No   |
| Day 16               | Fatigue                     | 1     | Unrelated   | No   | No   |
| Day 16               | Dysphasia                   | 1     | Unrelated   | No   | No   |
| Day 30               | Confusion                   | 1     | Unrelated   | No   | No   |
| Day 30               | Memory impairment           | 1     | Unrelated   | No   | No   |
| Day 30               | Muscle weakness right-sided | 1     | Unrelated   | No   | No   |
| Day 30               | Headache                    | 1     | Unrelated   | No   | No   |
| Day 30               | Fatigue                     | 1     | Unrelated   | No   | No   |
| Day 30               | Dysphasia                   | 1     | Unrelated   | No   | No   |
| Patient 10           |                             |       |             |      |      |
| Day 1                | Seizure                     | 3     | Unrelated   | No   | No   |
| Day 1                | Muscle weakness upper limb  | 1     | Unrelated   | No   | No   |
| Day 1                | Fatigue                     | 1     | Unrelated   | No   | No   |
| Day 1                | Myalgia                     | 1     | Unrelated   | No   | No   |
| Day 1                | Tinnitus                    | 1     | Unrelated   | No   | No   |
| Day 1                | Dysphasia                   | 1     | Unrelated   | No   | No   |
| Day 1                | Seizure                     | 1     | Unrelated   | No   | No   |
| Day 2                | Seizure                     | 1     | Unrelated   | No   | No   |
| Day 30               | Seizure                     | 1     | Unrelated   | No   | No   |
| Day 30               | Seizure                     | 1     | Unrelated   | No   | No   |
| Day 30               | Seizure                     | 1     | Unrelated   | No   | No   |
| Day 30               | Seizure                     | 1     | Unrelated   | No   | No   |
| Day 30               | Seizure                     | 1     | Unrelated   | No   | No   |
| Patient 11           |                             |       |             |      |      |
| Day 30               | Headache                    | 1     | Unrelated   | No   | No   |

\* SAE = serious adverse event; † DLT = dose limiting toxicity

**Figure S1.** Fresh tissue fluorescence at three different imaging windows. Linear regression (with 95% confidence intervals) of mean fluorescence intensity (MFI) normalized to panitumumab-IRDye800 dose (mg/kg) against tissue weight of fresh tissue pieces removed 1 day, 2 days and 3 days after panitumumab-IRDye800 infusion.

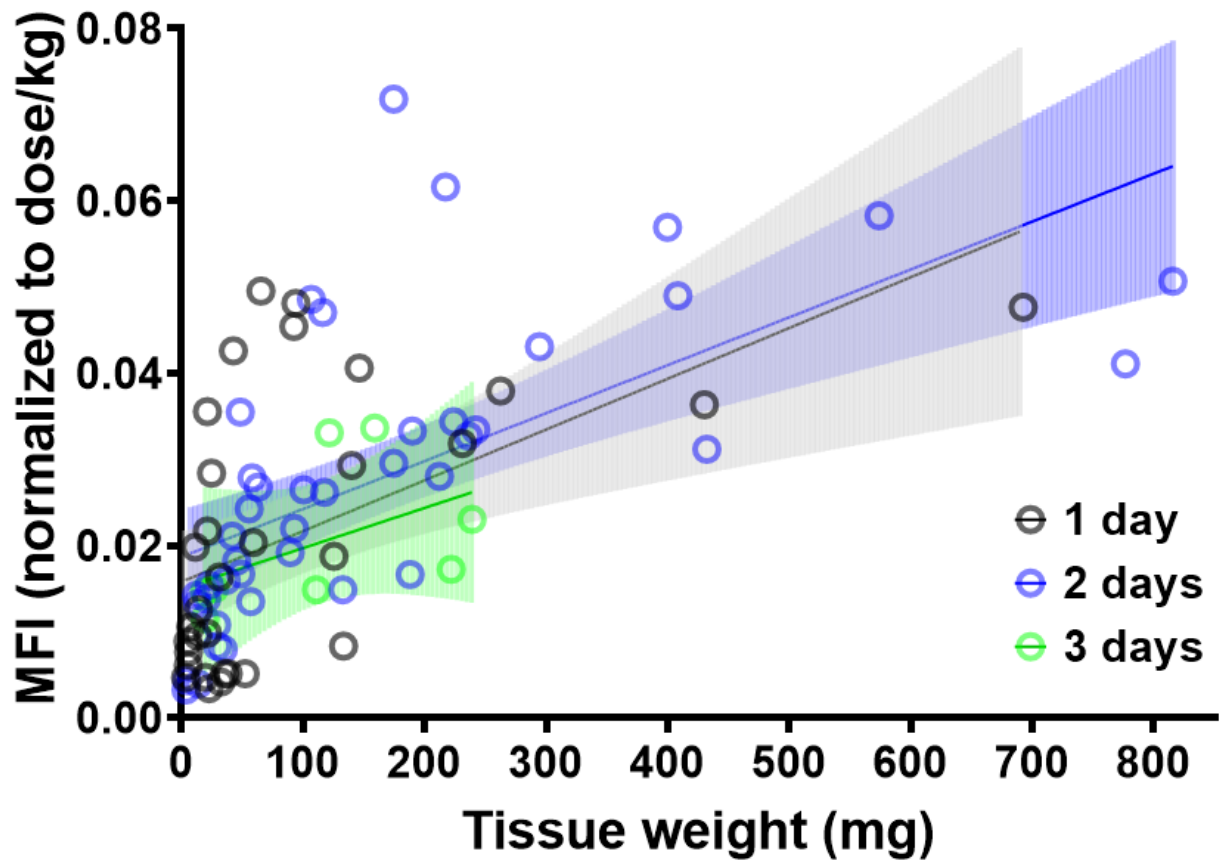

**Figure S2.** MFI (*left y-axis*) of tumor (T) and normal (N) tissue sections and tumor TBR (*left y-axis*) for low and high dose cohorts. *Dotted lines:* MFI cutoff values (0.5545, red; 0.7445, blue) for maximal specificity and sensitivity of respective ROC curves in **Figure 4B**;  $P < 0.0001$  (50 mg T vs 50 mg N; 100 mg T vs 100 mg N; 50 mg T vs 100 mg T) and  $P = 0.018$  (50 mg N vs 100 mg N) for MFI comparisons;  $P = 0.0035$  (50 mg TBR vs 100 mg TBR). Statistical test: unpaired t-test with Welch's correction.

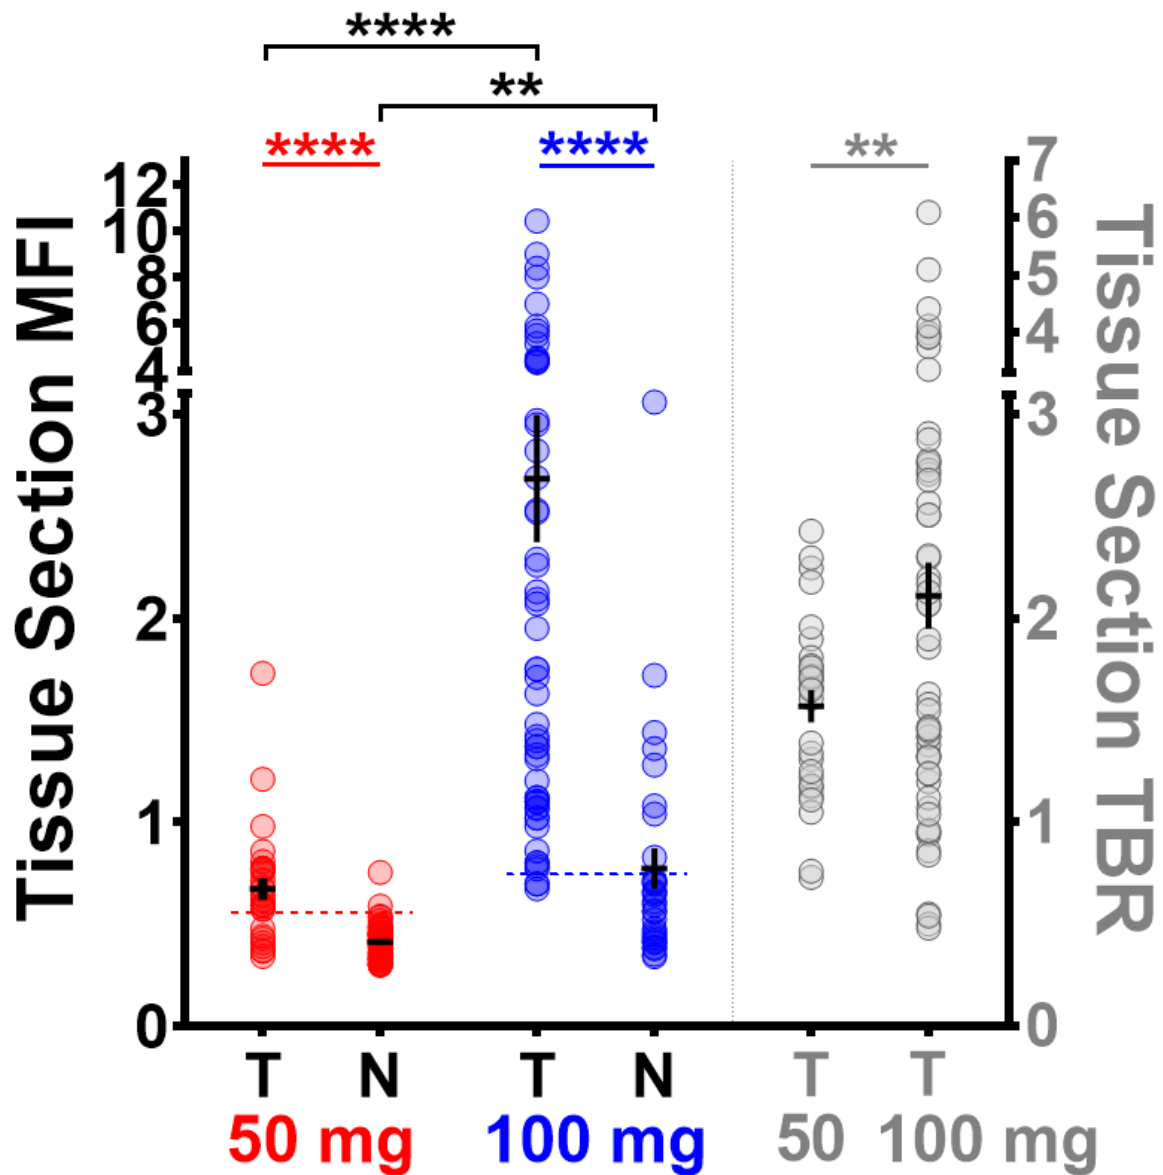

**Figure S3.** NIR fluorescence in gliotic brain tissue. Histological and immunohistochemical stainings of resected HGG tissue containing gliosis (*dotted outlines*).

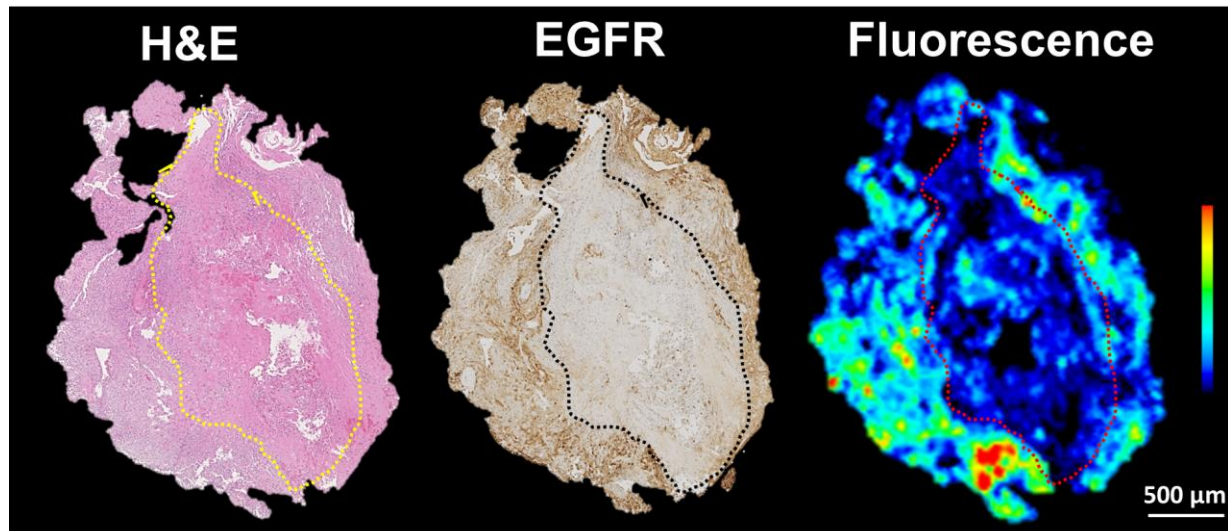

Supplement: Supplementary file 1 — Supplementary figures and tables. [file thnov11p7130s1.pdf]
